# Supplementary material for: Protocol of the Swiss Longitudinal Cohort Study (SWICOS) in rural Switzerland
Source: PubMed Central journal article supplement — BMJ Open. 2016 Nov 28;6(11):e013280. doi: 10.1136/bmjopen-2016-013280 (PMC5168533; doi:10.1136/bmjopen-2016-013280), 2016-11-28
Supplement: bmjopen-2016-013280supp.pdf [file bmjopen-2016-013280supp.pdf]

**15. Sintomi**

| Per favore, specificare quante volte avete sofferto di uno dei sintomi qui di seguito elencati nel corso dell'ultimo mese: | <b>Mai</b>                            | <b>Di rado o occasionalmente</b>      | <b>Spesso o di continuo</b>           |
|----------------------------------------------------------------------------------------------------------------------------|---------------------------------------|---------------------------------------|---------------------------------------|
| <b>15.1. Mancanza di fiato</b>                                                                                             | <input type="checkbox"/> <sub>1</sub> | <input type="checkbox"/> <sub>2</sub> | <input type="checkbox"/> <sub>3</sub> |
| <b>15.2. Mal di testa</b>                                                                                                  | <input type="checkbox"/> <sub>1</sub> | <input type="checkbox"/> <sub>2</sub> | <input type="checkbox"/> <sub>3</sub> |
| <b>15.3. Dolori al torace</b>                                                                                              | <input type="checkbox"/> <sub>1</sub> | <input type="checkbox"/> <sub>2</sub> | <input type="checkbox"/> <sub>3</sub> |
| <b>15.4. Dolori di pancia</b>                                                                                              | <input type="checkbox"/> <sub>1</sub> | <input type="checkbox"/> <sub>2</sub> | <input type="checkbox"/> <sub>3</sub> |
| <b>15.5. Dolori alle gambe (camminando)</b>                                                                                | <input type="checkbox"/> <sub>1</sub> | <input type="checkbox"/> <sub>2</sub> | <input type="checkbox"/> <sub>3</sub> |
| <b>15.6. Altri dolori</b>                                                                                                  | <input type="checkbox"/> <sub>1</sub> | <input type="checkbox"/> <sub>2</sub> | <input type="checkbox"/> <sub>3</sub> |
| <b>15.7. Febbre</b>                                                                                                        | <input type="checkbox"/> <sub>1</sub> | <input type="checkbox"/> <sub>2</sub> | <input type="checkbox"/> <sub>3</sub> |
| <b>15.8. Stanchezza senza spiegazione</b>                                                                                  | <input type="checkbox"/> <sub>1</sub> | <input type="checkbox"/> <sub>2</sub> | <input type="checkbox"/> <sub>3</sub> |
| <b>15.9. Abbattimento / depressione</b>                                                                                    | <input type="checkbox"/> <sub>1</sub> | <input type="checkbox"/> <sub>2</sub> | <input type="checkbox"/> <sub>3</sub> |
| <b>15.10. Nervosismo/ senso di paura</b>                                                                                   | <input type="checkbox"/> <sub>1</sub> | <input type="checkbox"/> <sub>2</sub> | <input type="checkbox"/> <sub>3</sub> |
| <b>15.11. Gambe gonfie</b>                                                                                                 | <input type="checkbox"/> <sub>1</sub> | <input type="checkbox"/> <sub>2</sub> | <input type="checkbox"/> <sub>3</sub> |
| <b>15.12. Tosse</b>                                                                                                        | <input type="checkbox"/> <sub>1</sub> | <input type="checkbox"/> <sub>2</sub> | <input type="checkbox"/> <sub>3</sub> |
| <b>15.13. Capogiri</b>                                                                                                     | <input type="checkbox"/> <sub>1</sub> | <input type="checkbox"/> <sub>2</sub> | <input type="checkbox"/> <sub>3</sub> |
| <b>15.14. Capogiri alzandosi in piedi</b>                                                                                  | <input type="checkbox"/> <sub>1</sub> | <input type="checkbox"/> <sub>2</sub> | <input type="checkbox"/> <sub>3</sub> |
| <b>15.15. Stitichezza</b>                                                                                                  | <input type="checkbox"/> <sub>1</sub> | <input type="checkbox"/> <sub>2</sub> | <input type="checkbox"/> <sub>3</sub> |
| <b>15.16. Diarrea</b>                                                                                                      | <input type="checkbox"/> <sub>1</sub> | <input type="checkbox"/> <sub>2</sub> | <input type="checkbox"/> <sub>3</sub> |
| <b>15.17. Prurito della pelle</b>                                                                                          | <input type="checkbox"/> <sub>1</sub> | <input type="checkbox"/> <sub>2</sub> | <input type="checkbox"/> <sub>3</sub> |

## 16. Mancanza di respiro (classificazione NYHA)

|                                                                                                               |                                                                                                                                                                                                                                                                                                                                                                                                                                                                                                                                                     |
|---------------------------------------------------------------------------------------------------------------|-----------------------------------------------------------------------------------------------------------------------------------------------------------------------------------------------------------------------------------------------------------------------------------------------------------------------------------------------------------------------------------------------------------------------------------------------------------------------------------------------------------------------------------------------------|
| <p><b>16.1. Quale è la risposta che più le si addice?</b><br/>(per favore, specificare solo una risposta)</p> | <p><input type="checkbox"/><sub>1</sub> posso svolgere qualsiasi attività fisica senza avere mancanza di respiro.</p> <p><input type="checkbox"/><sub>2</sub> mi manca il respiro se faccio sforzi particolari (come ad es.: salire alcuni piani di scale).</p> <p><input type="checkbox"/><sub>3</sub> mi manca il respiro nelle normali attività quotidiane (come ad es.: camminare in piano).</p> <p><input type="checkbox"/><sub>4</sub> mi manca il respiro a riposo e non posso fare alcuna attività fisica senza che mi manchi il fiato.</p> |
|---------------------------------------------------------------------------------------------------------------|-----------------------------------------------------------------------------------------------------------------------------------------------------------------------------------------------------------------------------------------------------------------------------------------------------------------------------------------------------------------------------------------------------------------------------------------------------------------------------------------------------------------------------------------------------|

## 17. Dolori al petto (angina) in caso di problemi cardiaci

|                                                                                                                                                  |                                                                                                                                                                                                                                                                                                                                                                                                                                                                                                                  |
|--------------------------------------------------------------------------------------------------------------------------------------------------|------------------------------------------------------------------------------------------------------------------------------------------------------------------------------------------------------------------------------------------------------------------------------------------------------------------------------------------------------------------------------------------------------------------------------------------------------------------------------------------------------------------|
| <p><b>17.1. Facendo quale attività compaiono dolori al petto o sente un peso sul torace?</b><br/>(per favore, specificare solo una risposta)</p> | <p><input type="checkbox"/><sub>0</sub> io non ho nessun sintomo cardiaco.</p> <p><input type="checkbox"/><sub>1</sub> se faccio attività fisiche particolarmente intense (ad es.: sport).</p> <p><input type="checkbox"/><sub>2</sub> se faccio sforzi fisici (ad es.: salire alcuni piani di scale).</p> <p><input type="checkbox"/><sub>3</sub> nelle normali attività quotidiane (ad es.: camminare in piano).</p> <p><input type="checkbox"/><sub>4</sub> in attività fisiche leggere o anche a riposo.</p> |
|--------------------------------------------------------------------------------------------------------------------------------------------------|------------------------------------------------------------------------------------------------------------------------------------------------------------------------------------------------------------------------------------------------------------------------------------------------------------------------------------------------------------------------------------------------------------------------------------------------------------------------------------------------------------------|

## 18. Dolori generici

|                                                                                                                                                                                                                                       |                                                                                                                                                                                                                                                                                                                    |
|---------------------------------------------------------------------------------------------------------------------------------------------------------------------------------------------------------------------------------------|--------------------------------------------------------------------------------------------------------------------------------------------------------------------------------------------------------------------------------------------------------------------------------------------------------------------|
| <p><b>18.1. Riferiti ad una scala da 0 (= nessun dolore) a 10 (= dolori fortissimi), in media che intensità avevano i dolori da Lei sofferti sull'arco degli ultimi 7 giorni?</b><br/>(per favore, immettere un valore da 0 a 10)</p> | <input type="text"/> <input type="text"/>                                                                                                                                                                                                                                                                          |
| <p><b>18.2. Nel caso in cui Lei abbia dolori, con che frequenza ne soffre?</b></p>                                                                                                                                                    | <p><input type="checkbox"/><sub>1</sub> una volta al mese o raramente</p> <p><input type="checkbox"/><sub>2</sub> più volte al mese ma non giornalmente</p> <p><input type="checkbox"/><sub>3</sub> tutti i giorni: una o più volte</p> <p><input type="checkbox"/><sub>4</sub> di continuo senza interruzione</p> |

**19. Anamnesi (storia medica)**

| Le è mai stato detto da un medico che Lei soffre di una di queste malattie?                                                    | No                                    | Si                                    |
|--------------------------------------------------------------------------------------------------------------------------------|---------------------------------------|---------------------------------------|
| <b>19.1. Ipertensione arteriosa</b><br>Se sì, da quanti anni? <input type="text"/> <input type="text"/>                        | <input type="checkbox"/> <sub>0</sub> | <input type="checkbox"/> <sub>1</sub> |
| <b>19.2. Eccessivo livello di grassi nel sangue</b><br>Se sì, da quanti anni? <input type="text"/> <input type="text"/>        | <input type="checkbox"/> <sub>0</sub> | <input type="checkbox"/> <sub>1</sub> |
| <b>19.3. Diabete</b><br>Se sì, da quanti anni? <input type="text"/> <input type="text"/>                                       | <input type="checkbox"/> <sub>0</sub> | <input type="checkbox"/> <sub>1</sub> |
| <b>19.4. Angina pectoris o cardiopatia ischemia</b><br>Se sì, da quanti anni? <input type="text"/> <input type="text"/>        | <input type="checkbox"/> <sub>0</sub> | <input type="checkbox"/> <sub>1</sub> |
| <b>19.5. Infarto miocardico</b><br>Se sì, da quanti anni? <input type="text"/> <input type="text"/>                            | <input type="checkbox"/> <sub>0</sub> | <input type="checkbox"/> <sub>1</sub> |
| <b>19.6. Insufficienza cardiaca</b><br>Se sì, da quanti anni? <input type="text"/> <input type="text"/>                        | <input type="checkbox"/> <sub>0</sub> | <input type="checkbox"/> <sub>1</sub> |
| <b>19.7. Colpo apoplettico</b><br>Se sì, da quanti anni? <input type="text"/> <input type="text"/>                             | <input type="checkbox"/> <sub>0</sub> | <input type="checkbox"/> <sub>1</sub> |
| <b>19.8. Bronchite o Asma</b><br>Se sì, da quanti anni? <input type="text"/> <input type="text"/>                              | <input type="checkbox"/> <sub>0</sub> | <input type="checkbox"/> <sub>1</sub> |
| <b>19.9. Artrite o malattia reumatica</b><br>Se sì, da quanti anni? <input type="text"/> <input type="text"/>                  | <input type="checkbox"/> <sub>0</sub> | <input type="checkbox"/> <sub>1</sub> |
| <b>19.10. Osteoporosi</b><br>Se sì, da quanti anni? <input type="text"/> <input type="text"/>                                  | <input type="checkbox"/> <sub>0</sub> | <input type="checkbox"/> <sub>1</sub> |
| <b>19.11. Depressione</b><br>Se sì, da quanti anni? <input type="text"/> <input type="text"/>                                  | <input type="checkbox"/> <sub>0</sub> | <input type="checkbox"/> <sub>1</sub> |
| <b>19.12. Cataratta, glaucoma o affezione della retina</b><br>Se sì, da quanti anni? <input type="text"/> <input type="text"/> | <input type="checkbox"/> <sub>0</sub> | <input type="checkbox"/> <sub>1</sub> |

## 20. Operazioni chirurgiche

|                                                                                                                                                                                                                                                                                                                                                                                                                                                                                                                                                           |                                                                                                                          |
|-----------------------------------------------------------------------------------------------------------------------------------------------------------------------------------------------------------------------------------------------------------------------------------------------------------------------------------------------------------------------------------------------------------------------------------------------------------------------------------------------------------------------------------------------------------|--------------------------------------------------------------------------------------------------------------------------|
| <p><b>20.1. È mai stato sottoposto ad un intervento chirurgico?</b></p>                                                                                                                                                                                                                                                                                                                                                                                                                                                                                   | <p><input type="checkbox"/><sub>0</sub> No → <i>andare al punto 21.</i><br/> <input type="checkbox"/><sub>1</sub> Si</p> |
| <p><b>20.2. Intervento chirurgico 1</b></p> <p>Che tipo di intervento? <input type="text"/><input type="text"/></p> <p>quando? (anno) <input type="text"/><input type="text"/><input type="text"/><input type="text"/></p>                                        |                                                                                                                          |
| <p><b>20.3. Intervento chirurgico 2 (in caso di più interventi chirurgici)</b></p> <p>Che tipo di intervento? <input type="text"/><input type="text"/></p> <p>quando? (anno) <input type="text"/><input type="text"/><input type="text"/><input type="text"/></p> |                                                                                                                          |
| <p><b>20.4. Intervento chirurgico 3 (in caso di più interventi chirurgici)</b></p> <p>Che tipo di intervento? <input type="text"/><input type="text"/></p> <p>quando? (anno) <input type="text"/><input type="text"/><input type="text"/><input type="text"/></p> |                                                                                                                          |
| <p><b>20.5. Intervento chirurgico 4 (in caso di più interventi chirurgici)</b></p> <p>Che tipo di intervento? <input type="text"/><input type="text"/></p> <p>quando? (anno) <input type="text"/><input type="text"/><input type="text"/><input type="text"/></p> |                                                                                                                          |
| <p><b>20.6. Intervento chirurgico 5 (in caso di più interventi chirurgici)</b></p> <p>Che tipo di intervento? <input type="text"/><input type="text"/></p> <p>quando? (anno) <input type="text"/><input type="text"/><input type="text"/><input type="text"/></p> |                                                                                                                          |

## 21. Medicamenti

|                                                                                                                                                                                                                            |                      |
|----------------------------------------------------------------------------------------------------------------------------------------------------------------------------------------------------------------------------|----------------------|
| <p>Nel caso in cui Lei attualmente stia prendendo dei medicinali, per favore li elenchi tutti (i farmaci prescritti dal suo medico e i medicinali da lei acquistati, anche gli antidolorifici e le sostanze vegetali):</p> |                      |
| <b>21.1. Medicamento 1</b>                                                                                                                                                                                                 |                      |
| Nome:                                                                                                                                                                                                                      | <input type="text"/> |
| <b>21.2. Medicamento 2</b>                                                                                                                                                                                                 |                      |
| Nome:                                                                                                                                                                                                                      | <input type="text"/> |
| <b>21.3. Medicamento 3</b>                                                                                                                                                                                                 |                      |
| Nome:                                                                                                                                                                                                                      | <input type="text"/> |
| <b>21.4. Medicamento 4</b>                                                                                                                                                                                                 |                      |
| Nome:                                                                                                                                                                                                                      | <input type="text"/> |
| <b>21.5. Medicamento 5</b>                                                                                                                                                                                                 |                      |
| Nome:                                                                                                                                                                                                                      | <input type="text"/> |
| <b>21.6. Medicamento 6</b>                                                                                                                                                                                                 |                      |
| Nome:                                                                                                                                                                                                                      | <input type="text"/> |
| <b>21.7. Medicamento 7</b>                                                                                                                                                                                                 |                      |
| Nome:                                                                                                                                                                                                                      | <input type="text"/> |
| <b>21.8. Medicamento 8</b>                                                                                                                                                                                                 |                      |
| Nome:                                                                                                                                                                                                                      | <input type="text"/> |
| <b>21.9. Medicamento 9</b>                                                                                                                                                                                                 |                      |
| Nome:                                                                                                                                                                                                                      | <input type="text"/> |
| <b>21.10. Medicamento 10</b>                                                                                                                                                                                               |                      |
| Nome:                                                                                                                                                                                                                      | <input type="text"/> |
